# Supplementary material
Source: PubMed Central journal article supplement (PMC6092013)
Supplement: pr8b00190_si_001.pdf [file pr8b00190_si_001.pdf]

## Supporting Information

### Synovial fluid metabolites differentiate between septic and non-septic joint pathologies

James R Anderson<sup>1</sup>, Marie M Phelan<sup>2,3</sup>, Peter D Clegg<sup>1</sup>, Mandy J Peffers<sup>1\*</sup> and Luis M Rubio-Martinez<sup>4\*</sup>

<sup>1</sup>Institute of Ageing and Chronic Disease, University of Liverpool, Liverpool, UK

<sup>2</sup>Institute of Integrative Biology, University of Liverpool, Liverpool, UK

<sup>3</sup>HLS Technology Directorate, University of Liverpool, Liverpool, UK

<sup>4</sup>Institute of Veterinary Science, University of Liverpool, Leahurst Campus, UK

\*corresponding authors

#### Corresponding authors email addresses

|                       |                                |                  |
|-----------------------|--------------------------------|------------------|
| Mandy J Peffers       | peffs@liverpool.ac.uk          | Tel: 07872692102 |
| Luis M Rubio-Martinez | luis.rubiomartinez@hotmail.com | Tel: 07903389609 |
|                       | lrubio@liverpool.ac.uk         |                  |

#### Contents

**Table S1.** Statistically significant differentially abundant peaks between septic and non-septic equine synovial fluid.

**Table S1.** Statistically significant differentially abundant peaks between septic and non-septic equine synovial fluid. T-test,  $p < 0.05$ .

| Metabolite                  | Pattern File PEAK Number | PEAK Number | p value  | Fold Change | Mean Fold Change | Median Fold Change |
|-----------------------------|--------------------------|-------------|----------|-------------|------------------|--------------------|
| 2-HYDROXYGLUTARATE          | 207                      | 1           | 4.09E-06 | 0.61        | 0.61             | 0.61               |
| 3-HYDROXY-3-METHYLGLUTARATE | 183                      | 1           | 0.00723  | 1.56        | 1.56             | 1.56               |
| 3-HYDROXYBUTYRATE           | 188                      | 1           | 0.00207  | 1.42        | 1.42             | 1.42               |
| ACETATE                     | 236                      | 1           | 0.01926  | 2.32        | 2.32             | 2.32               |
| AGMATINE                    | 148                      | 1           | 0.00388  | 1.26        | 1.26             | 1.26               |
| ALANINE                     | 262                      | 1           | 0.00510  | 1.74        | 1.74             | 1.74               |
| ALANINE                     | 263                      | 2           | 0.00400  | 1.75        |                  |                    |
| BIOTIN                      | 209                      | 1           | 0.00005  | 0.57        | 0.71             | 0.73               |
| BIOTIN                      | 210                      | 2           | 0.00390  | 0.77        |                  |                    |
| BIOTIN                      | 211                      | 3           | 0.02578  | 0.82        |                  |                    |
| BIOTIN                      | 267                      | 4           | 0.00244  | 0.70        |                  |                    |
| CITRATE                     | 171                      | 1           | 0.00051  | 1.88        | 3.75             | 4.13               |
| CITRATE                     | 172                      | 2           | 0.00011  | 3.49        |                  |                    |
| CITRATE                     | 175                      | 3           | 0.00014  | 4.76        |                  |                    |
| CITRATE                     | 176                      | 4           | 0.00011  | 4.86        |                  |                    |
| CREATINE PHOSPHATE          | 60                       | 1           | 0.02617  | 1.23        | 1.26             | 1.26               |
| CREATINE PHOSPHATE          | 61                       | 2           | 0.00196  | 1.29        |                  |                    |
| CREATININE                  | 53                       | 1           | 0.00598  | 1.35        | 1.60             | 1.60               |
| CREATININE                  | 149                      | 2           | 5.75E-06 | 1.84        |                  |                    |
| GLUCOSE                     | 39                       | 1           | 0.00247  | 1.93        | 1.88             | 1.91               |
| GLUCOSE                     | 40                       | 2           | 0.00109  | 2.04        |                  |                    |
| GLUCOSE                     | 41                       | 3           | 0.00313  | 1.97        |                  |                    |
| GLUCOSE                     | 42                       | 4           | 0.00800  | 1.93        |                  |                    |
| GLUCOSE                     | 65                       | 5           | 0.01642  | 1.69        |                  |                    |
| GLUCOSE                     | 66                       | 6           | 0.00436  | 1.82        |                  |                    |
| GLUCOSE                     | 68                       | 7           | 0.01392  | 1.69        |                  |                    |
| GLUCOSE                     | 69                       | 8           | 0.00466  | 1.84        |                  |                    |
| GLUCOSE                     | 70                       | 9           | 0.03247  | 1.49        |                  |                    |
| GLUCOSE                     | 71                       | 10          | 0.00210  | 1.70        |                  |                    |
| GLUCOSE                     | 72                       | 11          | 0.00173  | 1.64        |                  |                    |
| GLUCOSE                     | 73                       | 12          | 0.00149  | 1.89        |                  |                    |
| GLUCOSE                     | 74                       | 13          | 0.00303  | 1.80        |                  |                    |
| GLUCOSE                     | 75                       | 14          | 0.00509  | 1.75        |                  |                    |

|                     |     |    |         |      |      |      |
|---------------------|-----|----|---------|------|------|------|
| GLUCOSE             | 80  | 15 | 0.00055 | 1.85 |      |      |
| GLUCOSE             | 81  | 16 | 0.00009 | 1.84 |      |      |
| GLUCOSE             | 83  | 17 | 0.00012 | 1.76 |      |      |
| GLUCOSE             | 84  | 18 | 0.00014 | 1.71 |      |      |
| GLUCOSE             | 85  | 19 | 0.00104 | 1.85 |      |      |
| GLUCOSE             | 86  | 20 | 0.00127 | 1.91 |      |      |
| GLUCOSE             | 87  | 21 | 0.00209 | 1.85 |      |      |
| GLUCOSE             | 88  | 22 | 0.00183 | 1.93 |      |      |
| GLUCOSE             | 89  | 23 | 0.00208 | 1.81 |      |      |
| GLUCOSE             | 102 | 24 | 0.00173 | 1.87 |      |      |
| GLUCOSE             | 103 | 25 | 0.00115 | 1.94 |      |      |
| GLUCOSE             | 104 | 26 | 0.00254 | 1.87 |      |      |
| GLUCOSE             | 105 | 27 | 0.00129 | 1.91 |      |      |
| GLUCOSE             | 106 | 28 | 0.00234 | 1.88 |      |      |
| GLUCOSE             | 107 | 29 | 0.00168 | 1.95 |      |      |
| GLUCOSE             | 108 | 30 | 0.00163 | 1.98 |      |      |
| GLUCOSE             | 109 | 31 | 0.00133 | 2.00 |      |      |
| GLUCOSE             | 110 | 32 | 0.00153 | 2.00 |      |      |
| GLUCOSE             | 111 | 33 | 0.00128 | 2.05 |      |      |
| GLUCOSE             | 112 | 34 | 0.00137 | 2.02 |      |      |
| GLUCOSE             | 113 | 35 | 0.00135 | 2.05 |      |      |
| GLUCOSE             | 114 | 36 | 0.00115 | 1.95 |      |      |
| GLUCOSE             | 115 | 37 | 0.00150 | 1.95 |      |      |
| GLUCOSE             | 116 | 38 | 0.00056 | 2.06 |      |      |
| GLUCOSE             | 117 | 39 | 0.00110 | 2.00 |      |      |
| GLUCOSE             | 118 | 40 | 0.00037 | 2.02 |      |      |
| GLUCOSE             | 119 | 41 | 0.00097 | 1.98 |      |      |
| GLUCOSE             | 132 | 42 | 0.00010 | 1.98 |      |      |
| GLUCOSE             | 133 | 43 | 0.00101 | 1.93 |      |      |
| GLUCOSE             | 134 | 44 | 0.00255 | 1.69 |      |      |
| GLUCOSE-6-PHOSPHATE | 58  | 1  | 0.00119 | 1.37 |      |      |
| GLUCOSE-6-PHOSPHATE | 129 | 2  | 0.00784 | 1.36 | 1.38 | 1.37 |
| GLUCOSE-6-PHOSPHATE | 130 | 3  | 0.00227 | 1.41 |      |      |
| GLUTAMATE           | 197 | 1  | 0.01746 | 1.29 | 1.29 | 1.29 |
| GLUTAMINE           | 180 | 1  | 0.00037 | 1.66 |      |      |
| GLUTAMINE           | 181 | 2  | 0.00018 | 1.69 | 1.34 | 1.5  |
| GLUTAMINE           | 182 | 3  | 0.04998 | 1.33 |      |      |
| GLUTAMINE           | 219 | 4  | 0.00001 | 0.66 |      |      |
| GLYCINE             | 101 | 1  | 0.00091 | 1.53 | 1.53 | 1.53 |

|                       |     |   |          |      |      |      |
|-----------------------|-----|---|----------|------|------|------|
| GLYCYLPROLINE         | 232 | 1 | 0.00017  | 0.77 | 0.66 | 0.66 |
| GLYCYLPROLINE         | 233 | 2 | 7.46E-06 | 0.54 |      |      |
| HISTIDINE             | 143 | 1 | 0.00353  | 1.31 | 1.28 | 1.28 |
| HISTIDINE             | 144 | 2 | 0.00079  | 1.25 |      |      |
| LEUCINE               | 244 | 1 | 0.00824  | 1.27 | 1.25 | 1.25 |
| LEUCINE               | 246 | 2 | 0.04653  | 1.23 |      |      |
| N-ACETYLCYSTEINE      | 222 | 1 | 0.00011  | 0.65 | 0.65 | 0.65 |
| N-ISOVALEROYLGLYCINE  | 304 | 1 | 0.00224  | 0.80 | 0.80 | 0.80 |
| N-PHENYLACETYLGLYCINE | 10  | 1 | 0.00180  | 0.55 | 0.55 | 0.55 |
| PHENYLALANINE         | 4   | 1 | 0.00291  | 1.42 | 1.46 | 1.49 |
| PHENYLALANINE         | 5   | 2 | 0.00344  | 1.49 |      |      |
| PHENYLALANINE         | 6   | 3 | 0.00413  | 1.49 |      |      |
| PI-METHYLHISTIDINE    | 137 | 1 | 0.02448  | 0.74 | 0.72 | 0.74 |
| PI-METHYLHISTIDINE    | 139 | 2 | 0.02026  | 0.77 |      |      |
| PI-METHYLHISTIDINE    | 140 | 3 | 0.02210  | 0.66 |      |      |
| PYRUVATE              | 189 | 1 | 0.01229  | 1.53 | 1.53 | 1.53 |
| TYROSINE              | 21  | 1 | 0.01954  | 1.23 | 1.45 | 1.49 |
| TYROSINE              | 22  | 2 | 0.00066  | 1.41 |      |      |
| TYROSINE              | 28  | 3 | 0.00001  | 1.58 |      |      |
| TYROSINE              | 29  | 4 | 0.00003  | 1.57 |      |      |
| VALINE                | 203 | 1 | 0.01526  | 0.83 | 1.14 | 1.21 |
| VALINE                | 204 | 2 | 0.00804  | 0.82 |      |      |
| VALINE                | 295 | 3 | 0.00179  | 1.40 |      |      |
| VALINE                | 296 | 4 | 0.00143  | 1.40 |      |      |
| VALINE                | 299 | 5 | 0.03166  | 1.19 |      |      |
| VALINE                | 300 | 6 | 0.01854  | 1.23 |      |      |
